# Supplementary material
Source: Springer Nature journal article supplement (https://www.springermedizin.de/resource/supplementary/12943_2010_913_MOESM2_ESM.PDF/9551988)
Supplement: MOESM2 [file 9551988]

**A**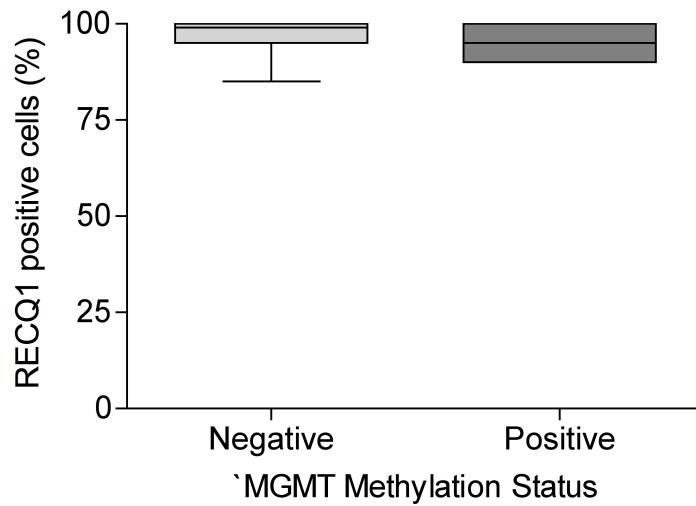**B**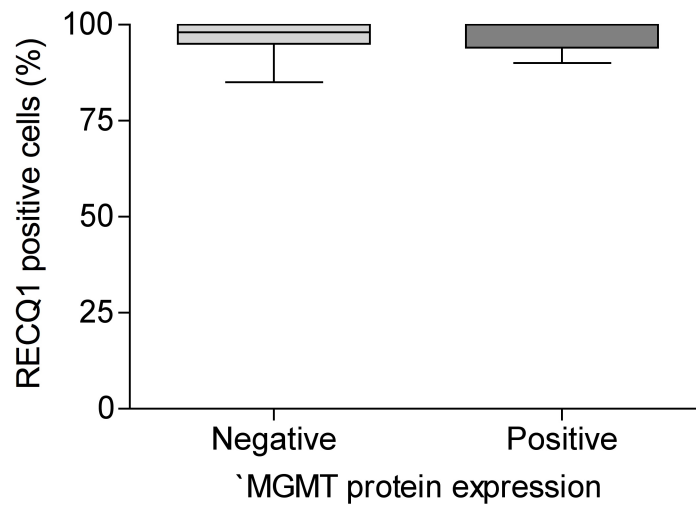

**Additional File 2. MGMT status in primary glioblastoma highly expressing RECQ1.** A) Box plot representing the count of RECQ1 positive cells expressing in percentage and the methylation status of the MGMT gene from 41 brain primary glioblastomas with staining intensity of 3+ for RECQ1. B) Box plot representing the count of RECQ1 positive cells and MGMT protein expression from 41 brain primary glioblastomas with staining intensity of 3+ for RECQ1.
